# Supplementary material for: Classification of Muscle Invasive Bladder Cancer to Predict Prognosis of Patients Treated with Immunotherapy
Source: Hindawi journal article supplement (doi:10.1155/2022/6737241), 2022-05-30
Supplement: f1 [file 6737241.f1.zip]

subtype1

subtype2

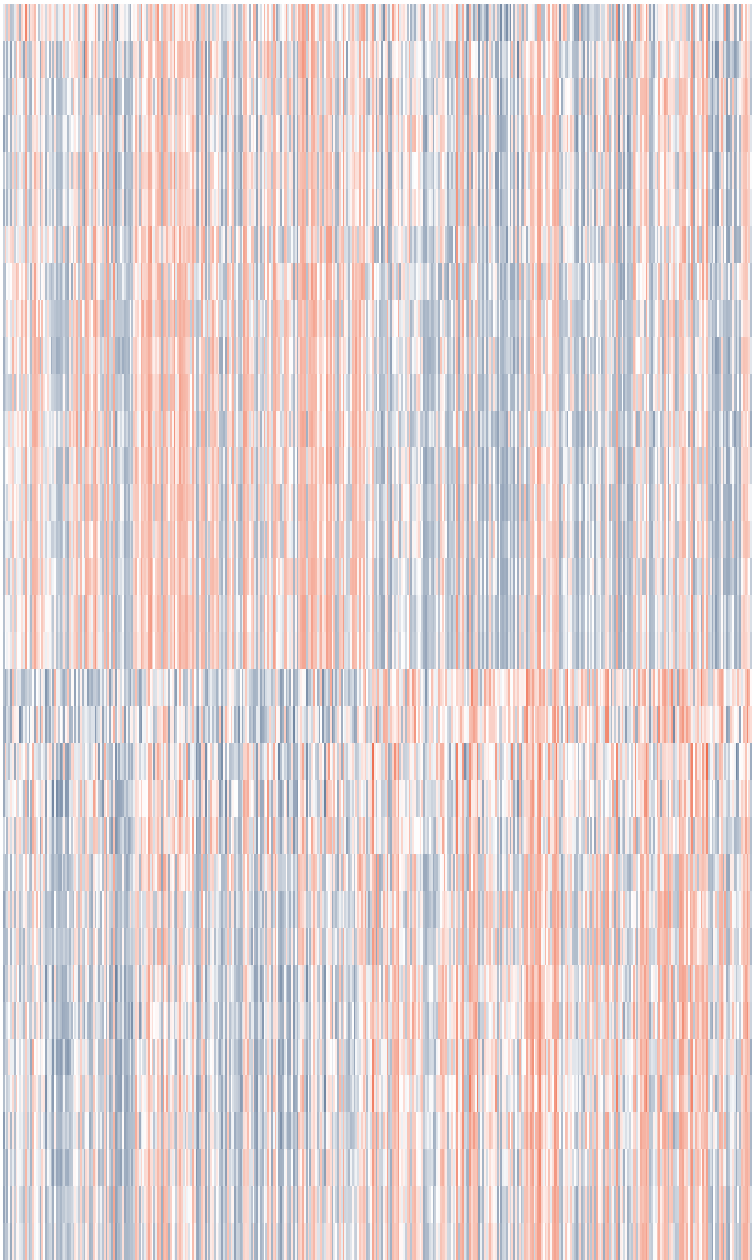

- CAF\_GROWTHFACTORS
- NABA\_ECM\_AFFILIATED
- KEGG\_COMPLEMENT\_AND\_COAGULATION\_CASCADES
- NABA\_SECRETED\_FACTORS
- NABA\_ECM\_REGULATORS
- NABA\_MATRISOME\_ASSOCIATED
- NABA\_BASEMENT\_MEMBRANES
- HNSC\_CAF
- OVARIAN\_CAF
- CAF\_FACTORS
- CAF\_POSITIVEMARKERS
- NABA\_PROTEOGLYCANS
- NABA\_COLLAGENS
- CAF\_MARKERS
- HEPATOCELLULAR\_CAF
- COLON\_CAF
- NABA\_ECM\_GLYCOPROTEINS
- NABA\_CORE\_MATRISOME
- KEGG\_RIG\_I\_LIKE\_RECEPTOR\_SIGNALING\_PATHWAY
- KEGG\_CYTOSOLIC\_DNA\_SENSING\_PATHWAY
- KEGG\_FC\_EPSILON\_RI\_SIGNALING\_PATHWAY
- KEGG\_FC\_GAMMA\_R\_MEDIATED\_PHAGOCYTOSIS
- KEGG\_LEUKOCYTE\_TRANSENDOTHELIAL\_MIGRATION
- CAF\_CHEMOKINE
- KEGG\_ANTIGEN\_PROCESSING\_AND\_PRESENTATION
- KEGG\_INTESTINAL\_IMMUNE\_NETWORK\_FOR\_IGA\_PRODUCTION
- KEGG\_TOLL\_LIKE\_RECEPTOR\_SIGNALING\_PATHWAY
- KEGG\_NOD\_LIKE\_RECEPTOR\_SIGNALING\_PATHWAY
- KEGG\_T\_CELL\_RECEPTOR\_SIGNALING\_PATHWAY
- KEGG\_B\_CELL\_RECEPTOR\_SIGNALING\_PATHWAY
- KEGG\_NATURAL\_KILLER\_CELL\_MEDIATED\_CYTOTOXICITY
- KEGG\_CHEMOKINE\_SIGNALING\_PATHWAY
- KEGG\_CYTOKINE\_CYTOKINE\_RECEPTOR\_INTERACTION
- KEGG\_HEMATOPOIETIC\_CELL\_LINEAGE
