# Supplementary figures and images for: Classification of Muscle Invasive Bladder Cancer to Predict Prognosis of Patients Treated with Immunotherapy
Source: Hindawi journal article supplement (doi:10.1155/2022/6737241), 2022-05-30

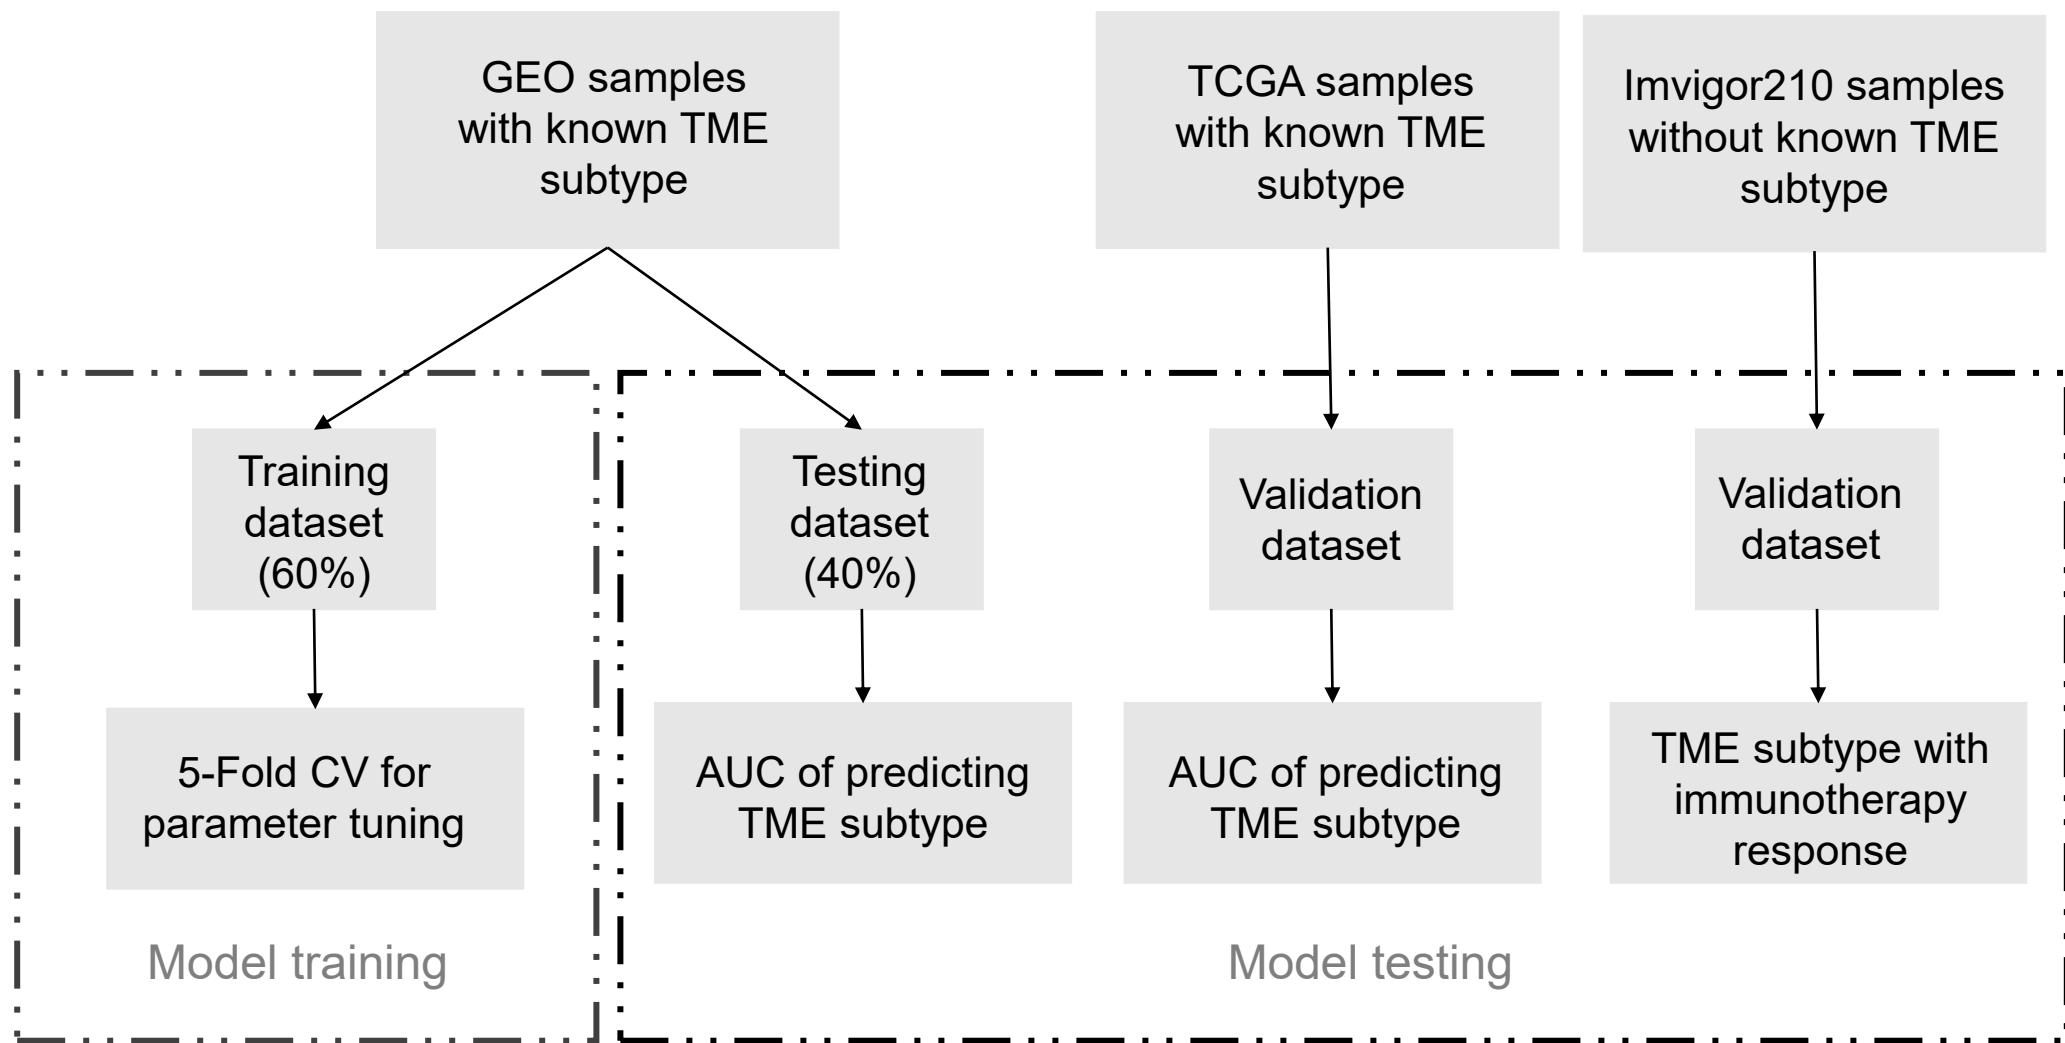

Supplement: f1 [file 6737241.f1.zip]

**A**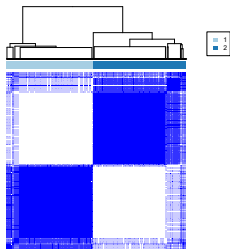**B**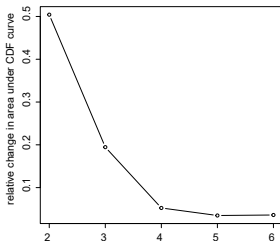**C**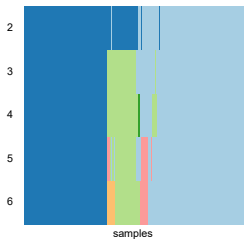**D**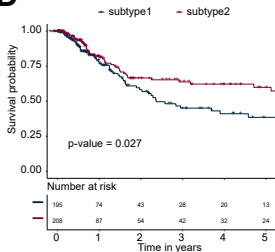

Supplement: f1 [file 6737241.f1.zip]

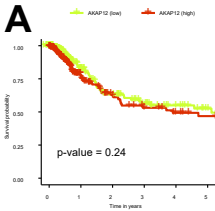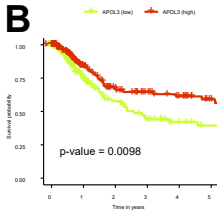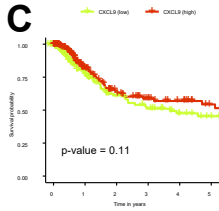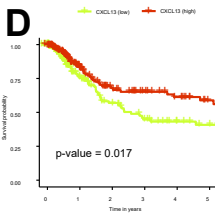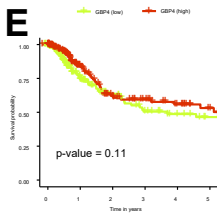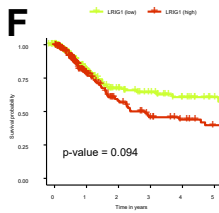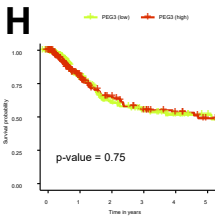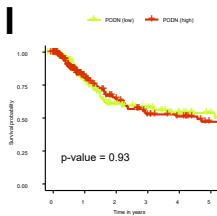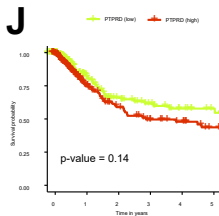

Supplement: f1 [file 6737241.f1.zip]
